# Supplementary material for: Facile synthesis of hydrangea-like copper–tannic acid networks for separation and purification of His-rich proteins with exceptional performance
Source: Royal Society of Chemistry journal article supplement (doi:10.1039/d4ay02276a), 2025-01-01
Supplement: d4ay02276a1.pdf [file d4ay02276a1.pdf]

1 **Facile synthesis of hydrangea-like copper-tannic acid**  
2 **networks for separation and purification of His-rich proteins**  
3 **with exceptional performance**

4 **Yaqian Zhang, Shenglan Chen, Xionglong Ye, Weimin Kong\*, Yang Chen\* and**  
5 **Yanting He\***

6

7

8 School of Pharmacy, Bengbu Medical University, 2600 Donghai Avenue, Bengbu,

9 Anhui, 233000, China

10

11

12

13

14

15

16 ● **Corresponding author:** Yanting He; Yang Chen; Weimin Kong

17 ● **Postal address:** School of Pharmacy, Bengbu Medical University,

18 Bengbu, Anhui, 233000, China

19 **E-mail:** heyanting@bbmu.edu.cn; nbastuff@yeah.net;

20 wmkong@bbmu.edu.cn

21

22

23

24

25

26

## 27 **Experimental Section**

### 28 **Materials.**

29 Tannic acid (TA) and copper sulfate pentahydrate ( $\text{CuSO}_4 \cdot 5\text{H}_2\text{O}$ ) were purchased  
30 from Aladdin (Shanghai, China). Sodium chloride (NaCl) and 2-methylimidazole were  
31 bought from Adamas-beta (Shanghai, China). Sodium hydroxide (NaOH), acetonitrile  
32 (ACN), disodium hydrogen phosphate ( $\text{Na}_2\text{HPO}_3$ ), sodium dihydrogen phosphate  
33 ( $\text{NaH}_2\text{PO}_3$ ), hydrochloric acid (HCl, AR, 36%-38%) and nitric acid ( $\text{HNO}_3$ , AR, 65%-  
34 68%) were obtained from Sinopharm (Shanghai, China). Sodium dodecyl sulfate (SDS)  
35 and hexadecyl trimethyl ammonium bromide (CTAB) were purchased from Sigma-  
36 Aldrich (Shanghai, China). Bovine hemoglobin (BHb), bovine serum albumin (BSA),  
37 lysozyme (Lyz) and cytochrome c (Cyt C) were bought from Lanji (shanghai, China).  
38 Bovine whole blood were obtained from Dingguo (Fujian, China). Deionized water  
39 ( $18.2 \text{ M}\Omega \text{ cm}^{-1}$ ) was purified with Milli-Q water system (Millipore, USA). All reagents  
40 listed above were of analytical grade or better.

### 41 **Characterization.**

42 Scanning electronic microscopy (SEM) images were obtained by Zeiss Gemini  
43 300. Transmission electron microscopy (TEM) analysis was conducted by the FEI  
44 Tecnai F20 with an accelerating voltage of 100 kV.  $\text{N}_2$  adsorption/desorption isotherms  
45 was finished on ASAP 2460 (Micromeritics, USA) at 77K. Before analysis, the samples  
46 were degassed by vacuum at 100 °C for 10 h. Powder X-ray diffraction (PXRD)  
47 patterns were obtained at a scan rate of  $5^\circ \text{ min}^{-1}$  over a range of 10-80° (2 $\theta$ ) on a X'Pert-  
48 Pro MPD (Philips, Holland) power diffractometer with Cu K $\alpha$  source ( $\lambda=1.5418 \text{ \AA}$ ).

49 Fourier-transform infrared spectra (FT-IR) were analyzed by attenuated total  
50 reflectance (ATR) on a Nicolet iS50 spectrometer (Thermo Fisher, USA) in the  
51 wavenumber range of 4000-400  $\text{cm}^{-1}$ . The X-ray photoelectron spectra (XPS) were  
52 analyzed by Thermo Kalpa. Inductively coupled plasma optical emission spectrometer  
53 (ICP-OES) analysis was conducted on iCAP 7400 (Thermo Fisher, USA). For the  
54 sample preparation, 100.3 mg material was digested in a mixed solution of concentrated  
55  $\text{HNO}_3$  (2 mL) and  $\text{HCl}$  (6 mL), and then diluted to 50 mL by 5%  $\text{HNO}_3$  solution.  
56 Finally, the obtained solution was diluted 100 times for further ICP-OES analysis.  
57 (TGA) was carried out on a thermal analyzer (STA449F5 Jupiter) at a heating rate of  
58 10  $\text{K min}^{-1}$  to 800  $^{\circ}\text{C}$  in air atmosphere at 50  $\text{mL min}^{-1}$ . HPLC analysis was performed  
59 using a Shimadzu HPLC system (Prominence LC-20A, Kyoto, Japan) and a Ultimate  
60 LP-C18 (4.6 mm  $\times$  150 mm, 5  $\mu\text{m}$ , 300  $\text{\AA}$ ) column (Welch Tech., Shanghai, China).  
61 The proteins were analyzed under gradient conditions: a gradient was used with buffer  
62 A (0.1% TFA aqueous solution) and buffer B (0.08% TFA acetonitrile solution); 0–7.0  
63 min, a linear gradient of buffer B from 33 to 70% was used; the flow rate was 1.0 mL  
64  $\text{min}^{-1}$ ; the column temperature was 35  $^{\circ}\text{C}$ . The injected sample volume was 10  $\mu\text{L}$ , and  
65 then was detected by a UV detector at 280 nm for BSA and Lyz, 406 nm for BHb and  
66 Cyt C. Electrophoresis of proteins was performed by regular sodium dodecyl sulfate  
67 polyacrylamide gel electrophoresis (SDS-PAGE) using a Mini-protean II system (Bio-  
68 Rad, USA) with 12% running and 5% stacking gels. Proteins were stained with  
69 Coomassie Brilliant Blue R-250.

70

71 **Supplementary figures**

72

73

74

75

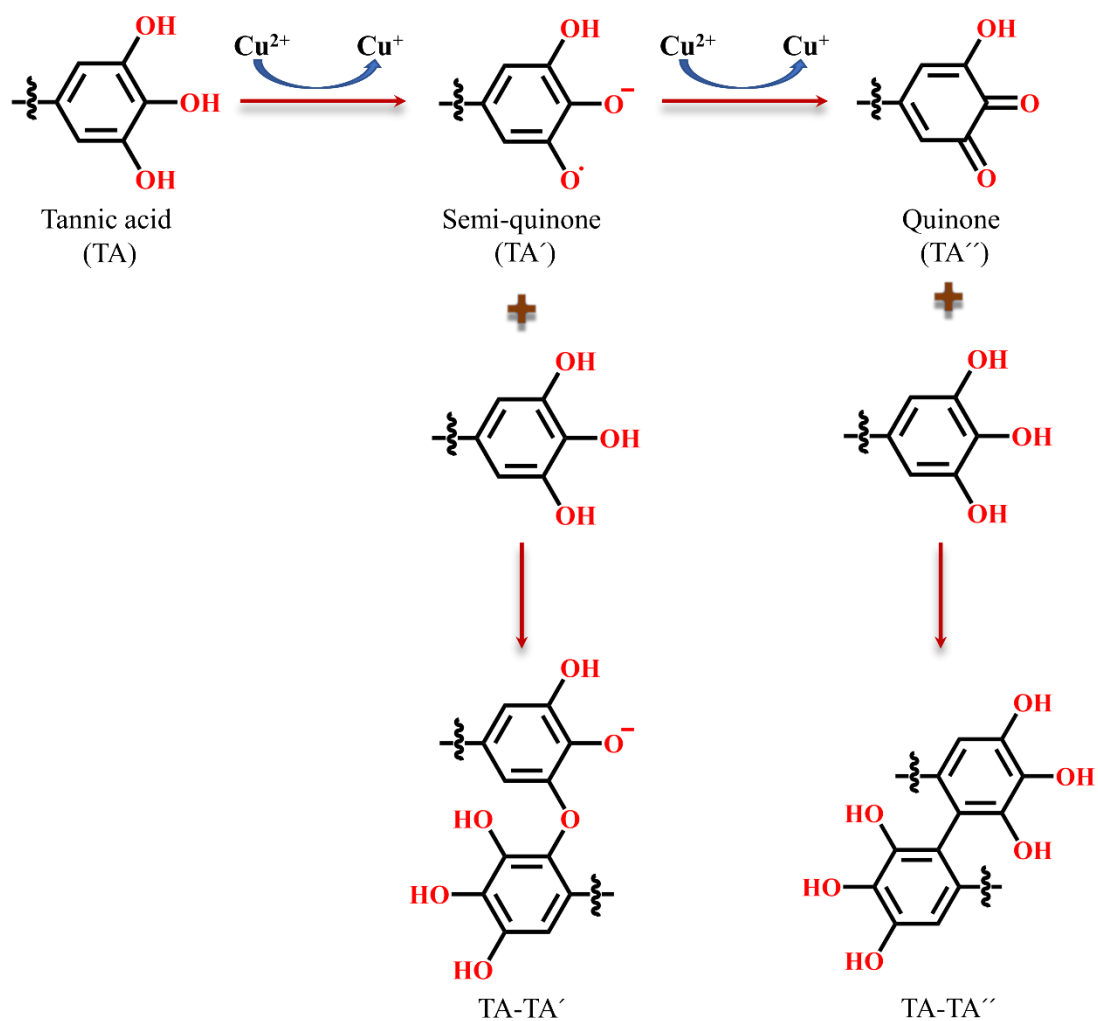

76

77 **Figure S1** Cu<sup>2+</sup>-mediated oxidative coupling assembly of tannic acid (TA).

78

79

80

81

82

83

84

85

86

87  
88  
89  
90  
91  
92  
93  
94  
95  
96

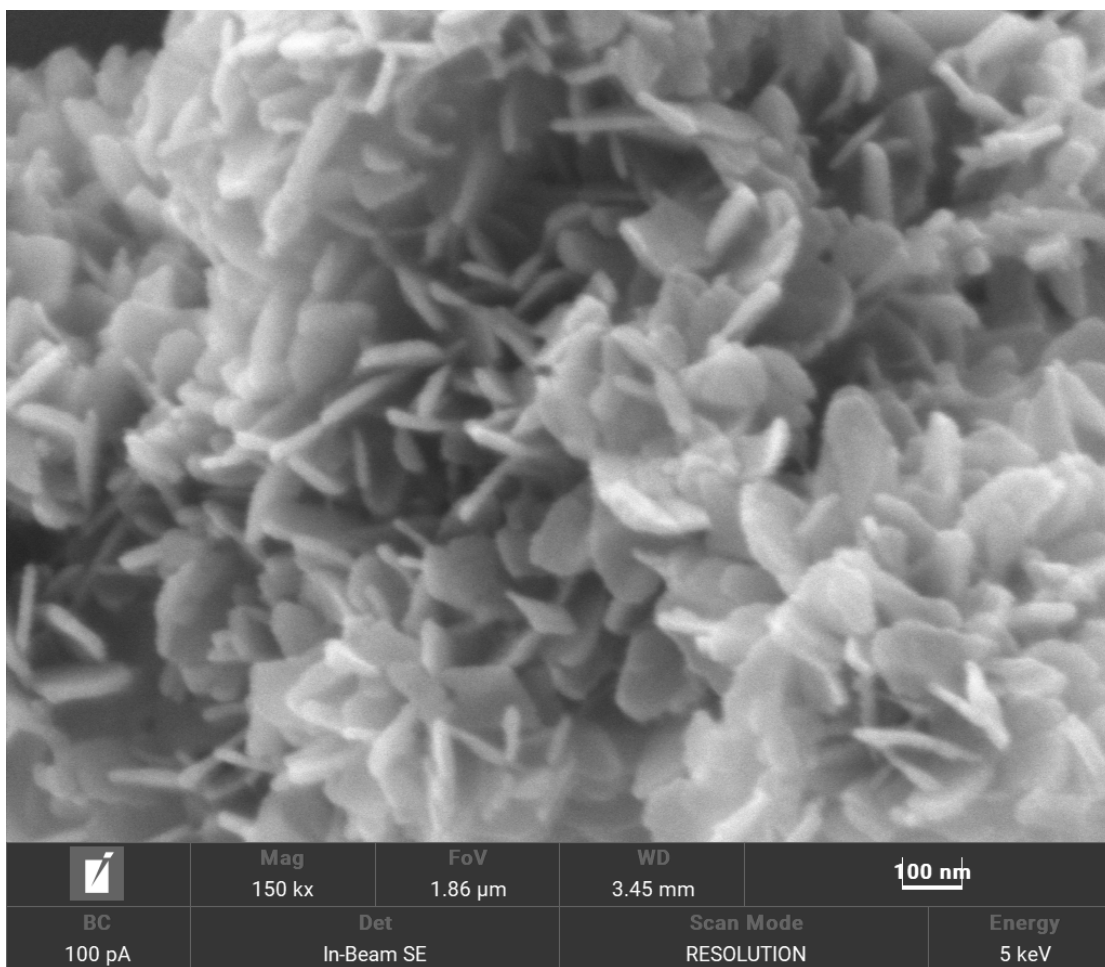

97  
98  
99  
100  
101  
102  
103  
104  
105  
106  
107

**Figure S2** SEM image of hydrangea-like Cu-TA networks.

108  
109  
110  
111  
112  
113  
114

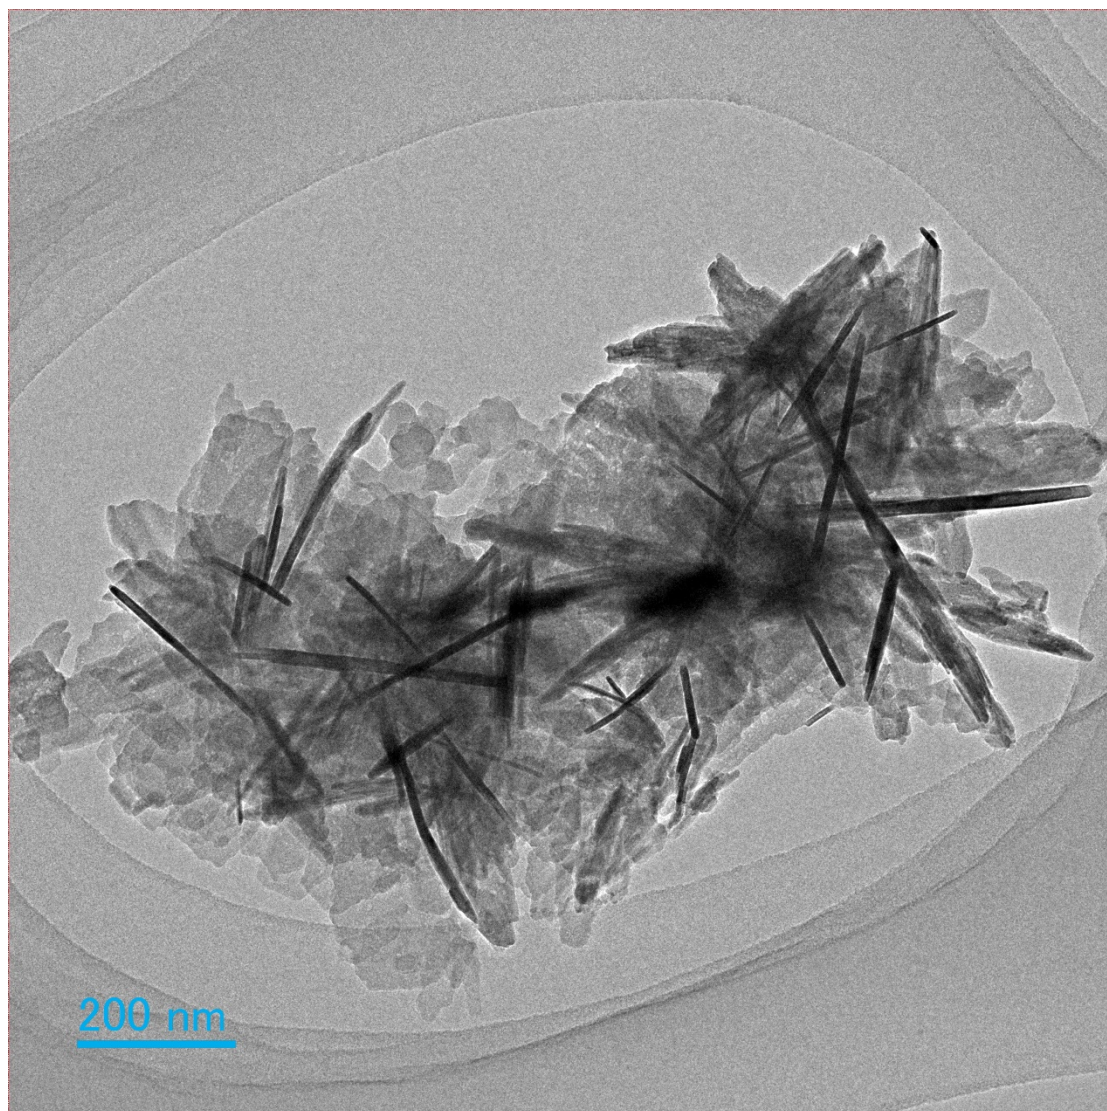

115  
116  
117  
118  
119  
120  
121  
122

**Figure S3** TEM image of hydrangea-like Cu-TA networks.

123

124

125

126 **Table S1** Isothermal parameters for BHb adsorption onto hydrangea-like Cu-TA  
 127 networks calculated using Freundlich model.

128

| Isothermal model        | Freundlich model                        |       |        |                         |
|-------------------------|-----------------------------------------|-------|--------|-------------------------|
| Linear form of equation | $\ln Q_e = \ln k_F + \frac{\ln C_e}{n}$ |       |        |                         |
| Isothermal parameters   | $k_F$ (mg/g)                            | n     | $R^2$  | Linear range<br>(mg/mL) |
| Cu-TA                   | 5568.33                                 | 0.782 | 0.9625 | 0.1-2.5                 |

129

130

131

132

133

134

135 **Table S2** Kinetic parameters for BHb adsorption on hydrangea-like Cu-TA networks  
 136 calculated using the pseudo-second order kinetic model and intraparticle diffusion  
 137 model.

138

| Kinetic model           | Pseudo-second-order model                             |              |        | Weber-Morris model                            |          |        |
|-------------------------|-------------------------------------------------------|--------------|--------|-----------------------------------------------|----------|--------|
| Linear form of equation | $\frac{t}{Q_t} = \frac{t}{Q_m} + \frac{1}{k_1 Q_m^2}$ |              |        | $Q_t = k_2 t^{1/2} + C$                       |          |        |
| Kinetic parameters      | $k_1$ (g mg <sup>-1</sup> h <sup>-1</sup> )           | $Q_m$ (mg/g) | $R^2$  | $k_2$ (mg g <sup>-1</sup> h <sup>-1/2</sup> ) | C        | $R^2$  |
| Cu-TA                   | 1.28*10 <sup>-5</sup>                                 | 28280.70     | 0.9991 | 7792.30                                       | 769.08   | 0.9734 |
|                         |                                                       |              |        | 3111.77                                       | 12194.96 | 0.9615 |
|                         |                                                       |              |        | 1649.15                                       | 17392.09 | 0.9460 |

139

140

141

142

143

144

145
